# Supplementary material for: Regional outcome disparities in German head and neck cancer patients: Shorter survival in Eastern Germany
Source: PubMed Central journal article supplement (PMC10726835; doi:10.1002/cam4.6690), 2023-12-01

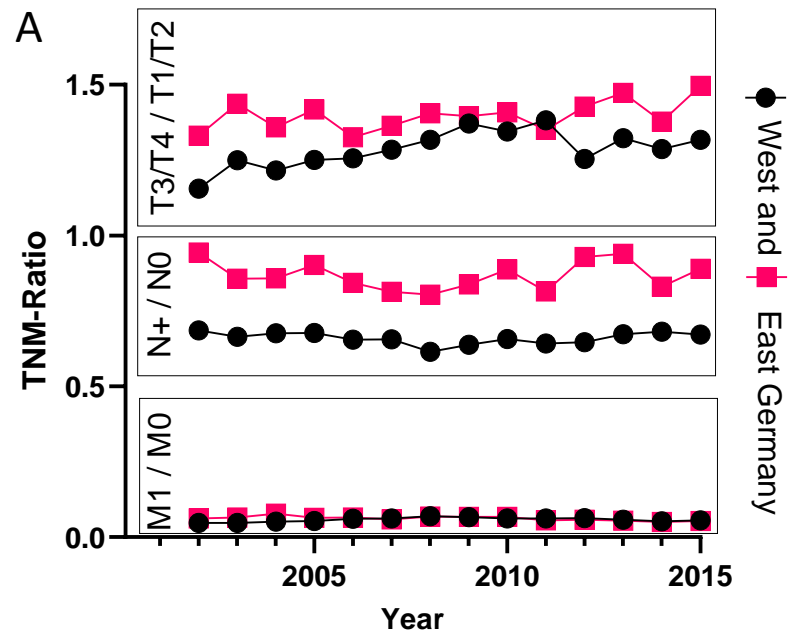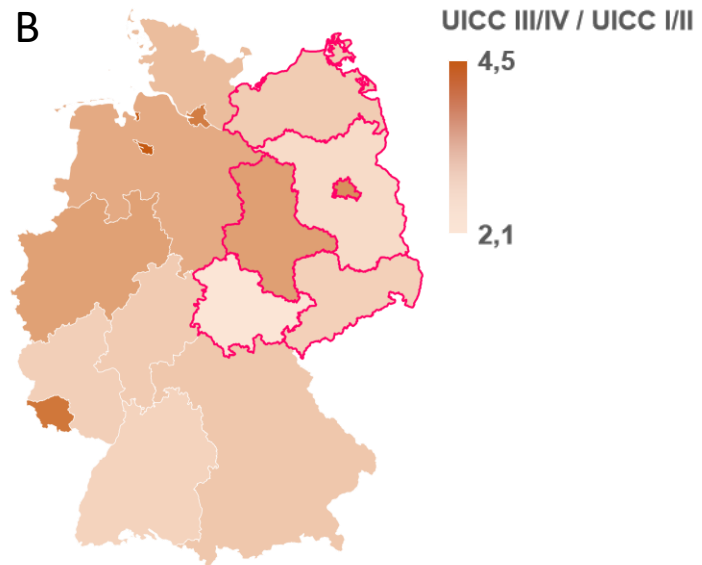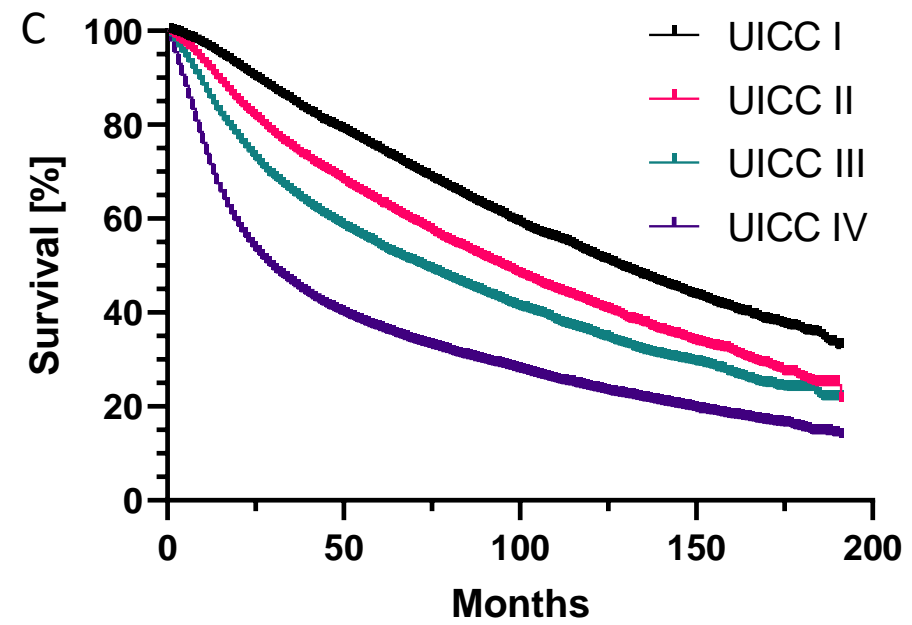

Supplement: CAM4-12-21426-s002.pdf [file CAM4-12-21426-s002.pdf]
